# Supplementary material for: Screening and identification of differentially expressed microRNAs in diffuse large B-cell lymphoma based on microRNA microarray
Source: PubMed Central journal article supplement — Oncol Lett. 2021 Aug 27;22(5):753. doi: 10.3892/ol.2021.13014 (PMC8436336; doi:10.3892/ol.2021.13014), 2021-08-27
Supplement: Supplementary_Data.pdf [file Supplementary_Data.pdf]

Table SI. Differentially expressed miRNAs between diffuse large B-cell lymphoma and lymph node reactive hyperplasia tissues.

| Systematic name  | P-value               | Fold-change (abs) | Regulation | Active sequence(5'-3')  |
|------------------|-----------------------|-------------------|------------|-------------------------|
| hsa-miR-101-3p   | 2.14x10 <sup>-7</sup> | 70.12449          | Up         | TTCAGTTATCACAGTACTGT    |
| hsa-miR-106b-5p  | 4.48x10 <sup>-2</sup> | 9.482359          | Up         | ATCTGCACTGTCAGCAC       |
| hsa-miR-1180-3p  | 2.38x10 <sup>-2</sup> | 9.992666          | Down       | ACACACCCACGCG           |
| hsa-miR-1182     | 5.90x10 <sup>-4</sup> | 36.81388          | Down       | GTCACATCCCTCCCA         |
| hsa-miR-1233-5p  | 1.23x10 <sup>-3</sup> | 2.448671          | Up         | TGCCGTGCCCTGG           |
| hsa-miR-1238-3p  | 2.50x10 <sup>-2</sup> | 2.448293          | Up         | GGGGCAGACAGAC           |
| hsa-miR-1247-3p  | 1.23x10 <sup>-3</sup> | 29.26198          | Down       | GCTCCAGTCTCGACG         |
| hsa-miR-1249-5p  | 2.36x10 <sup>-2</sup> | 3.68144           | Down       | AACTTGCCCATCTCC         |
| hsa-miR-1260a    | 1.06x10 <sup>-2</sup> | 5.853309          | Up         | TGGTGGCAGAGGTGG         |
| hsa-miR-1260b    | 1.30x10 <sup>-2</sup> | 3.598181          | Up         | ATGGTGGCAGTGGTG         |
| hsa-miR-1273d    | 3.35x10 <sup>-2</sup> | 7.063039          | Down       | ACTGCAGCCTCAACC         |
| hsa-miR-1275     | 5.75x10 <sup>-3</sup> | 2.853891          | Down       | GACAGCCTCTCCCC          |
| hsa-miR-128-1-5p | 6.70x10 <sup>-3</sup> | 8.246991          | Down       | TCTCAGACAGTGCTACG       |
| hsa-miR-1321     | 1.80x10 <sup>-2</sup> | 7.529308          | Down       | ATCACATTCACCTCCCT       |
| hsa-miR-140-5p   | 3.61x10 <sup>-2</sup> | 16.38111          | Up         | CTACCATAGGGTAAAACCACT   |
| hsa-miR-142-3p   | 1.92x10 <sup>-2</sup> | 12.39162          | Up         | TCCATAAAGTAGGAAACACTACA |
| hsa-miR-142-5p   | 5.11x10 <sup>-3</sup> | 39.28894          | Up         | AGTAGTGCTTTCTACTTTA     |
| hsa-miR-151a-3p  | 1.40x10 <sup>-2</sup> | 19.90538          | Up         | CCTCAAGGAGCTTCAGT       |
| hsa-miR-151a-5p  | 2.42x10 <sup>-2</sup> | 27.19609          | Up         | ACTAGACTGTGAGCTCC       |
| hsa-miR-151b     | 1.04x10 <sup>-2</sup> | 25.1236           | Up         | AGACTGTGAGCTCCTC        |
| hsa-miR-17-3p    | 1.24x10 <sup>-2</sup> | 15.93213          | Up         | CTACAAGTGCCTTCAC        |
| hsa-miR-181a-5p  | 1.91x10 <sup>-2</sup> | 2.745383          | Up         | ACTCACCGACAGCGT         |
| hsa-miR-181b-5p  | 5.01x10 <sup>-3</sup> | 2.744573          | Up         | ACCCACCGACAGCA          |
| hsa-miR-18a-5p   | 8.79x10 <sup>-3</sup> | 34.14763          | Up         | CTATCTGCACTAGATGCA      |
| hsa-miR-18b-5p   | 4.90x10 <sup>-2</sup> | 9.405125          | Up         | CTAACTGCACTAGATGCACC    |
| hsa-miR-1908-3p  | 1.15x10 <sup>-2</sup> | 4.043291          | Up         | CGGGGCGGAGC             |
| hsa-miR-192-5p   | 2.21x10 <sup>-2</sup> | 19.08265          | Up         | GGCTGTCAATTCATAGGTC     |
| hsa-miR-193a-3p  | 8.45x10 <sup>-4</sup> | 52.90833          | Up         | ACTGGGACTTTGTAGGC       |
| hsa-miR-198      | 4.17x10 <sup>-2</sup> | 2.056028          | Down       | GAACCTATCTCCCCTC        |
| hsa-miR-19a-3p   | 1.99x10 <sup>-2</sup> | 37.32824          | Up         | TCAGTTTTGCATAGATTTGCA   |
| hsa-miR-19b-3p   | 2.44x10 <sup>-2</sup> | 14.19882          | Up         | TCAGTTTTGCATGGATTTGC    |
| hsa-miR-20b-5p   | 3.44x10 <sup>-2</sup> | 20.62522          | Up         | CTACCTGCACTATGAGCAC     |
| hsa-miR-212-3p   | 1.30x10 <sup>-3</sup> | 3.758645          | Up         | GGCCGTGACTGGAGAC        |
| hsa-miR-2392     | 6.45x10 <sup>-3</sup> | 2.773214          | Down       | CACCTCTCACCCCC          |
| hsa-miR-23a-5p   | 3.02x10 <sup>-3</sup> | 25.24291          | Down       | AAATCCCATCCCCAG         |
| hsa-miR-28-5p    | 1.21x10 <sup>-3</sup> | 48.69122          | Up         | CTCAATAGACTGTGAGCTCC    |
| hsa-miR-298      | 2.26x10 <sup>-4</sup> | 16.73178          | Down       | TGGGAGAACCTCCCTG        |
| hsa-miR-30b-3p   | 3.40x10 <sup>-2</sup> | 7.454115          | Down       | GAAGTAAACATCCACCTCC     |
| hsa-miR-30c-5p   | 3.96x10 <sup>-2</sup> | 18.93942          | Up         | GCTGAGAGTGTAGGATGT      |
| hsa-miR-3131     | 4.41x10 <sup>-5</sup> | 4.222974          | Down       | AAGGCCCTTCACC           |
| hsa-miR-3138     | 3.40x10 <sup>-3</sup> | 2.507998          | Down       | ACTCCCTCTACCTCACT       |
| hsa-miR-3147     | 2.31x10 <sup>-3</sup> | 18.53377          | Down       | TCACACCCTCCTCAC         |
| hsa-miR-3161     | 3.34x10 <sup>-2</sup> | 10.73956          | Down       | ATCTGGGCCTCTGTTC        |
| hsa-miR-3174     | 1.35x10 <sup>-2</sup> | 8.312185          | Down       | GGCTCTGCATCTCTAAC       |
| hsa-miR-3180-3p  | 4.21x10 <sup>-2</sup> | 11.08701          | Down       | GGCCTCCGGAAGC           |
| hsa-miR-3188     | 4.57x10 <sup>-2</sup> | 2.325902          | Up         | CCCCGTATCCGCA           |
| hsa-miR-3190-3p  | 1.20x10 <sup>-2</sup> | 10.79868          | Down       | TCTCTGGCCGTCTACC        |
| hsa-miR-324-3p   | 3.99x10 <sup>-2</sup> | 2.193733          | Up         | CCAGCAGCACCTGGGG        |
| hsa-miR-324-5p   | 4.38x10 <sup>-2</sup> | 11.406            | Up         | ACACCAATGCCCTAGGG       |
| hsa-miR-342-3p   | 3.29x10 <sup>-2</sup> | 4.349299          | Up         | ACGGGTGCGATTTCTG        |
| hsa-miR-345-3p   | 4.84x10 <sup>-3</sup> | 2.480736          | Down       | CTCCAGACCCCTCG          |
| hsa-miR-34a-5p   | 4.49x10 <sup>-2</sup> | 4.617222          | Up         | ACAACCAGCTAAGACACTGC    |
| hsa-miR-361-5p   | 3.13x10 <sup>-2</sup> | 14.85806          | Up         | GTACCCCTGGAGATTC        |
| hsa-miR-3614-5p  | 3.00x10 <sup>-2</sup> | 12.47557          | Down       | GGGCAGCCTTCAGA          |
| hsa-miR-3617-5p  | 1.87x10 <sup>-2</sup> | 8.436015          | Down       | CCCATCTTGCAACTATG       |
| hsa-miR-3622b-5p | 1.61x10 <sup>-2</sup> | 2.33463           | Down       | TCACCTGACCTCCCA         |
| hsa-miR-365b-5p  | 6.02x10 <sup>-3</sup> | 12.80723          | Down       | ACAGCTGCCCTGA           |

Table SI. Continued.

| Systematic name | P-value               | Fold-change (abs) | Regulation | Active sequence(5'-3') |
|-----------------|-----------------------|-------------------|------------|------------------------|
| hsa-miR-3665    | 1.05x10 <sup>-2</sup> | 2.027274          | Up         | CGCCGCCCCG             |
| hsa-miR-3667-5p | 1.59x10 <sup>-2</sup> | 22.6581           | Down       | ACCTTCTCCTCAATGGG      |
| hsa-miR-3692-5p | 1.86x10 <sup>-2</sup> | 14.72697          | Down       | CAGTATCCACTCCTGAC      |
| hsa-miR-370-3p  | 2.06x10 <sup>-2</sup> | 3.704139          | Down       | ACCAGGTTCCACCC         |
| hsa-miR-3713    | 6.42x10 <sup>-7</sup> | 40.15543          | Down       | ACCATCCCCAAACGG        |
| hsa-miR-373-5p  | 1.88x10 <sup>-3</sup> | 7.193833          | Up         | GGAAAGCGCCCC           |
| hsa-miR-374a-5p | 7.66x10 <sup>-3</sup> | 27.15214          | Up         | CACTTATCAGGTTGTATTATAA |
| hsa-miR-378b    | 4.78x10 <sup>-2</sup> | 8.988843          | Down       | TTCTGCCTCCAAGTCC       |
| hsa-miR-3926    | 4.96x10 <sup>-2</sup> | 8.856387          | Down       | TCTCTGCCTGCTTTTTG      |
| hsa-miR-3934-5p | 4.45x10 <sup>-2</sup> | 3.578004          | Down       | CTGCCTCAGTTTCCA        |
| hsa-miR-3940-5p | 2.86x10 <sup>-2</sup> | 2.430282          | Up         | CAGAGCCCGCCC           |
| hsa-miR-422a    | 2.64x10 <sup>-3</sup> | 20.52196          | Down       | GCCTTCTGACCCTA         |
| hsa-miR-4260    | 3.00x10 <sup>-2</sup> | 5.203043          | Down       | TGGGACTCCATGCC         |
| hsa-miR-4261    | 1.98x10 <sup>-2</sup> | 6.866216          | Up         | TGGGTCCCTGTTTCC        |
| hsa-miR-4269    | 3.17x10 <sup>-4</sup> | 25.19368          | Down       | GCCAGGGCTGTCTG         |
| hsa-miR-4286    | 3.41x10 <sup>-3</sup> | 3.108928          | Up         | GGTACCAGGAGTGGG        |
| hsa-miR-4314    | 4.19x10 <sup>-2</sup> | 11.40398          | Down       | CTGTCCCATTTCCTCA       |
| hsa-miR-4419b   | 1.28x10 <sup>-6</sup> | 49.37555          | Down       | CCATCTTCCTCAGCC        |
| hsa-miR-4429    | 2.15x10 <sup>-2</sup> | 11.64174          | Down       | CGCCTCTCAGCCC          |
| hsa-miR-4443    | 3.89x10 <sup>-2</sup> | 2.606597          | Down       | AAAACCCACGCCTCC        |
| hsa-miR-4450    | 1.91x10 <sup>-2</sup> | 8.473152          | Down       | TCACCACTTCTCCAAATC     |
| hsa-miR-4458    | 1.27x10 <sup>-2</sup> | 12.57597          | Down       | TTCTTCCACACCTACCT      |
| hsa-miR-4459    | 1.70x10 <sup>-2</sup> | 7.154827          | Down       | CTCCACCTCCTCCG         |
| hsa-miR-4465    | 4.52x10 <sup>-2</sup> | 2.086498          | Up         | TCCCCTGGTCAGACT        |
| hsa-miR-4470    | 1.54x10 <sup>-2</sup> | 18.60512          | Down       | TCTCGGCTTCCACG         |
| hsa-miR-4481    | 2.75x10 <sup>-2</sup> | 3.290987          | Down       | AACCACCAGCCCAC         |
| hsa-miR-4482-3p | 1.05x10 <sup>-2</sup> | 11.18457          | Down       | GAGCCCCACTGAGA         |
| hsa-miR-4502    | 1.42x10 <sup>-2</sup> | 8.017699          | Down       | CTTCAGCACCATCATCA      |
| hsa-miR-4513    | 2.00x10 <sup>-2</sup> | 14.10811          | Down       | ATGGGCCTCCAGCC         |
| hsa-miR-4514    | 2.60x10 <sup>-2</sup> | 17.31821          | Down       | TTCCCCAATCCTGCC        |
| hsa-miR-4519    | 2.27x10 <sup>-5</sup> | 27.98703          | Down       | CAGCCCTGCGCA           |
| hsa-miR-4522    | 7.75x10 <sup>-3</sup> | 3.937784          | Down       | ACCGGCCTACAGGC         |
| hsa-miR-4531    | 1.51x10 <sup>-3</sup> | 16.68473          | Down       | TCAGAAGCCTTCTCCA       |
| hsa-miR-4539    | 1.35x10 <sup>-2</sup> | 2.055893          | Down       | GCCCAGCTCAGCC          |
| hsa-miR-4640-5p | 1.25x10 <sup>-2</sup> | 15.83523          | Down       | CCCACCAGCTGCT          |
| hsa-miR-4660    | 1.03x10 <sup>-4</sup> | 14.60166          | Down       | CTCCATTTTCCACCAG       |
| hsa-miR-4665-5p | 1.33x10 <sup>-2</sup> | 3.553443          | Down       | GCTCGCGCTCACG          |
| hsa-miR-4667-5p | 1.08x10 <sup>-2</sup> | 2.465454          | Down       | GGTTCTCCTTCTGCTC       |
| hsa-miR-4685-5p | 2.74x10 <sup>-3</sup> | 16.03209          | Down       | AACCTTGCCCCACTC        |
| hsa-miR-4688    | 3.28x10 <sup>-2</sup> | 9.809486          | Down       | CCCAGGTCCTCTGC         |
| hsa-miR-4690-5p | 2.51x10 <sup>-2</sup> | 2.172444          | Down       | TTCAGCCCAGCCTCG        |
| hsa-miR-4726-5p | 2.63x10 <sup>-3</sup> | 23.28382          | Down       | CCACTCCAGGCTCC         |
| hsa-miR-4740-5p | 4.88x10 <sup>-2</sup> | 2.497923          | Up         | CCTGCCCCGAGAGG         |
| hsa-miR-4748    | 1.73x10 <sup>-5</sup> | 26.5318           | Down       | AGCAAATCCTCCCCAA       |
| hsa-miR-4749-3p | 2.69x10 <sup>-2</sup> | 2.0775            | Up         | CTGTGGGGGCAGG          |
| hsa-miR-4750-5p | 8.21x10 <sup>-4</sup> | 30.54813          | Down       | CACTCAACCACCTCC        |
| hsa-miR-4755-3p | 1.16x10 <sup>-5</sup> | 30.59946          | Down       | ACTTTCCTTCAGAGCC       |
| hsa-miR-4758-3p | 7.31x10 <sup>-3</sup> | 10.31413          | Down       | GAGGGTGGTCAGCA         |
| hsa-miR-4763-3p | 3.64x10 <sup>-2</sup> | 2.286812          | Up         | CCCGCCAGCAC            |
| hsa-miR-4773    | 3.85x10 <sup>-2</sup> | 11.60159          | Down       | GCCTTCTATGCTCCTG       |
| hsa-miR-4778-5p | 7.69x10 <sup>-4</sup> | 3.334096          | Down       | CCTCTTCTCCTTTACAG      |
| hsa-miR-4784    | 8.98x10 <sup>-4</sup> | 17.06986          | Down       | TCAGTCCCAGCATCTC       |
| hsa-miR-4800-5p | 6.85x10 <sup>-4</sup> | 2.233657          | Down       | TCCTTCTTCTCCTCGG       |
| hsa-miR-483-5p  | 3.06x10 <sup>-4</sup> | 2.287438          | Down       | CTCCCTTCTTCTCCTC       |
| hsa-miR-490-5p  | 1.12x10 <sup>-2</sup> | 10.33317          | Down       | ACCCACCTGGAGATC        |
| hsa-miR-5006-5p | 4.52x10 <sup>-2</sup> | 2.418425          | Down       | TTCCACCTCCTGCC         |
| hsa-miR-5100    | 6.45x10 <sup>-4</sup> | 2.938517          | Up         | AGAGGCACCGCTGG         |

Table SI. Continued.

| Systematic name   | P-value               | Fold-change (abs) | Regulation | Active sequence(5'-3') |
|-------------------|-----------------------|-------------------|------------|------------------------|
| hsa-miR-518a-5p   | 1.72x10 <sup>-3</sup> | 26.62272          | Down       | GAAAGGGCTTCCCTT        |
| hsa-miR-550a-3-5p | 1.67x10 <sup>-5</sup> | 21.68753          | Down       | CTCTTACTCCCTCAGGC      |
| hsa-miR-566       | 2.31x10 <sup>-4</sup> | 3.643826          | Down       | GTTGGGATCACAGGCGCCC    |
| hsa-miR-5703      | 3.45x10 <sup>-2</sup> | 3.064609          | Down       | ACCTTCCCGACTTCTC       |
| hsa-miR-575       | 2.36x10 <sup>-3</sup> | 2.228931          | Down       | GCTCCTGTCCAAGTGGCT     |
| hsa-miR-5787      | 1.44x10 <sup>-2</sup> | 3.014644          | Down       | ACCTCCCCGCGC           |
| hsa-miR-584-5p    | 3.75x10 <sup>-2</sup> | 9.183971          | Down       | CTCAGTCCCAGGCAAAC      |
| hsa-miR-590-5p    | 3.23x10 <sup>-2</sup> | 7.278402          | Up         | CTGCACTTTTATGAATAAGCTC |
| hsa-miR-598-5p    | 2.44x10 <sup>-2</sup> | 16.97915          | Down       | GCTCACACCATCGG         |
| hsa-miR-6081      | 4.03x10 <sup>-2</sup> | 5.459492          | Down       | GGCGCCTTGGCC           |
| hsa-miR-6083      | 2.26x10 <sup>-3</sup> | 22.26596          | Down       | CCCACAGCCTCTGA         |
| hsa-miR-6085      | 1.56x10 <sup>-2</sup> | 2.05188           | Up         | TGTGCTCCCCCAGC         |
| hsa-miR-610       | 3.78x10 <sup>-2</sup> | 10.30156          | Down       | TCCCAGCACACATTTAGC     |
| hsa-miR-6124      | 3.48x10 <sup>-2</sup> | 2.054311          | Down       | TCCTCCCCCTTCCTT        |
| hsa-miR-6129      | 6.04x10 <sup>-3</sup> | 3.737721          | Down       | TATACACCCAAGTCCCT      |
| hsa-miR-6133      | 4.31x10 <sup>-2</sup> | 7.324584          | Down       | TACCCAACCTCCTCCC       |
| hsa-miR-6134      | 4.08x10 <sup>-3</sup> | 4.569329          | Down       | TCTACATCCTACCACCTC     |
| hsa-miR-622       | 8.71x10 <sup>-3</sup> | 4.062231          | Down       | GCTCCAACCTCAGCAGA      |
| hsa-miR-629-3p    | 4.38x10 <sup>-2</sup> | 7.422704          | Up         | GCTGGGCTTACGTTGG       |
| hsa-miR-630       | 3.85x10 <sup>-2</sup> | 3.403911          | Down       | ACCTTCCCTGGTACAGA      |
| hsa-miR-639       | 1.36x10 <sup>-2</sup> | 3.423993          | Down       | ACAGCGCTCGCAACCGC      |
| hsa-miR-6509-5p   | 3.39x10 <sup>-5</sup> | 16.6939           | Down       | GTTCCACTGCCACTAC       |
| hsa-miR-6510-5p   | 5.68x10 <sup>-3</sup> | 2.443379          | Down       | GACTCCTCTCTCTCCC       |
| hsa-miR-6511b-5p  | 2.01x10 <sup>-2</sup> | 8.5665            | Down       | TGTCAGCCCCACTTC        |
| hsa-miR-6516-5p   | 1.75x10 <sup>-2</sup> | 4.386592          | Down       | TGCTCACACCTGTTACT      |
| hsa-miR-659-3p    | 1.84x10 <sup>-2</sup> | 15.72023          | Down       | TGGGGACCCTCCCT         |
| hsa-miR-660-5p    | 2.93x10 <sup>-2</sup> | 10.57289          | Up         | CAACTCCGATATGCAATGG    |
| hsa-miR-664b-5p   | 3.34x10 <sup>-2</sup> | 3.27124           | Down       | TACCCAATCATCTCCCT      |
| hsa-miR-665       | 4.23x10 <sup>-2</sup> | 5.849128          | Down       | AGGGGCCTCAGCCT         |
| hsa-miR-671-5p    | 6.99x10 <sup>-3</sup> | 2.040769          | Down       | CTCCAGCCCCT            |
| hsa-miR-6745      | 1.71x10 <sup>-7</sup> | 57.29566          | Down       | AACCAGACCTTCTTCCA      |
| hsa-miR-6748-5p   | 1.15x10 <sup>-2</sup> | 8.170377          | Down       | AATCCAGTCCTTCCCA       |
| hsa-miR-6754-5p   | 2.09x10 <sup>-2</sup> | 15.31405          | Down       | TCCTCCAAACCAGCC        |
| hsa-miR-6758-5p   | 4.69x10 <sup>-3</sup> | 12.507            | Down       | ACATCACATCCTTCCCC      |
| hsa-miR-6760-5p   | 6.94x10 <sup>-3</sup> | 8.461122          | Down       | TCTGCACTTCCACCTT       |
| hsa-miR-6765-5p   | 1.82x10 <sup>-2</sup> | 11.31385          | Down       | ACACACCCTCCTGGC        |
| hsa-miR-6769a-5p  | 4.92x10 <sup>-2</sup> | 2.154471          | Down       | AGGGCTCCTCCATACC       |
| hsa-miR-6772-5p   | 1.45x10 <sup>-2</sup> | 2.641794          | Down       | CCTCAGCTCCAGCC         |
| hsa-miR-6775-5p   | 5.52x10 <sup>-4</sup> | 2.047466          | Down       | CCAGCCTCCCTCC          |
| hsa-miR-6776-5p   | 1.59x10 <sup>-2</sup> | 9.299421          | Down       | AACCCCCACTGCAC         |
| hsa-miR-6777-5p   | 8.40x10 <sup>-3</sup> | 12.29263          | Down       | TCCACCACTGCCTGA        |
| hsa-miR-6781-5p   | 4.52x10 <sup>-3</sup> | 18.30708          | Down       | ACGCCCTTGACCTC         |
| hsa-miR-6782-5p   | 1.37x10 <sup>-2</sup> | 17.2861           | Down       | ACACCCCTGAATTCCC       |
| hsa-miR-6785-5p   | 4.38x10 <sup>-2</sup> | 6.809305          | Down       | CACCATCATCCACGC        |
| hsa-miR-6788-5p   | 1.23x10 <sup>-2</sup> | 19.95484          | Down       | TCTTACCACCTTCTCTCC     |
| hsa-miR-6789-5p   | 1.38x10 <sup>-2</sup> | 2.321417          | Up         | CCCGCGCGCC             |
| hsa-miR-6792-5p   | 4.90x10 <sup>-2</sup> | 6.305223          | Down       | TCACCCAGAGCCCC         |
| hsa-miR-6795-5p   | 2.95x10 <sup>-8</sup> | 55.44898          | Down       | ACAGCCTCTCATCCTG       |
| hsa-miR-6796-5p   | 1.32x10 <sup>-7</sup> | 50.75373          | Down       | CAGCCAGCTCTCCA         |
| hsa-miR-6809-5p   | 8.50x10 <sup>-5</sup> | 25.562            | Down       | TGATCCTCTTCTTCCCTTG    |
| hsa-miR-6815-5p   | 1.01x10 <sup>-2</sup> | 9.494452          | Down       | AATGACTCCTCCGGC        |
| hsa-miR-6817-5p   | 1.83x10 <sup>-2</sup> | 25.97243          | Down       | CCACTCCAAGCTTCC        |
| hsa-miR-6820-5p   | 5.85x10 <sup>-3</sup> | 2.051726          | Up         | TGACCCCAGCTCTGC        |
| hsa-miR-6830-5p   | 8.21x10 <sup>-5</sup> | 16.70263          | Down       | GATGTCCAGCCTCCT        |
| hsa-miR-6831-5p   | 1.44x10 <sup>-3</sup> | 2.670159          | Down       | GACCTCCTCCTCACA        |
| hsa-miR-6833-5p   | 1.95x10 <sup>-2</sup> | 2.316662          | Down       | TTTCTCCTCCCATCTTC      |
| hsa-miR-6847-5p   | 4.86x10 <sup>-2</sup> | 10.45117          | Down       | GCTCACACTCCACTG        |

Table SI. Continued.

| Systematic name | P-value               | Fold-change (abs) | Regulation | Active sequence(5'-3') |
|-----------------|-----------------------|-------------------|------------|------------------------|
| hsa-miR-6848-5p | 1.57x10 <sup>-2</sup> | 8.916698          | Down       | ACCATGGCCCATCCC        |
| hsa-miR-6856-5p | 3.02x10 <sup>-2</sup> | 5.029824          | Down       | CCACAGCACCCTG          |
| hsa-miR-6860    | 3.57x10 <sup>-3</sup> | 16.09079          | Down       | ACTCACCACAGCCCT        |
| hsa-miR-6865-5p | 2.49x10 <sup>-2</sup> | 14.27775          | Down       | TGAAGTCCCTCCTCTG       |
| hsa-miR-6867-5p | 1.78x10 <sup>-3</sup> | 2.370786          | Down       | TCCCTTCTCCTCTACA       |
| hsa-miR-6870-5p | 8.79x10 <sup>-3</sup> | 22.46113          | Down       | TCAACCCCATCTCC         |
| hsa-miR-6871-5p | 8.35x10 <sup>-3</sup> | 29.30605          | Down       | GCAACCACCCCGA          |
| hsa-miR-6872-3p | 1.54x10 <sup>-2</sup> | 4.89897           | Up         | GACCGCGGCAGG           |
| hsa-miR-6877-5p | 4.87x10 <sup>-3</sup> | 36.9801           | Down       | GCAGCTTCCACCCT         |
| hsa-miR-6881-5p | 1.52x10 <sup>-2</sup> | 10.85516          | Down       | TGACCCTCCTATCCTTAC     |
| hsa-miR-6886-5p | 8.54x10 <sup>-8</sup> | 59.34067          | Down       | AGCCCTCATCTCACCT       |
| hsa-miR-6893-5p | 3.61x10 <sup>-2</sup> | 3.506576          | Down       | GCTCCACCCTACACC        |
| hsa-miR-6894-5p | 2.53x10 <sup>-2</sup> | 14.68627          | Down       | TCTGGCCCAGCTCT         |
| hsa-miR-7-5p    | 4.31x10 <sup>-2</sup> | 11.81901          | Up         | ACAACAAAATCACTAGTCTTCC |
| hsa-miR-7107-5p | 3.21x10 <sup>-2</sup> | 2.086618          | Down       | CCCTTCCTCCTCCC         |
| hsa-miR-7109-5p | 7.24x10 <sup>-3</sup> | 3.365473          | Down       | AGCAGGGTCTCCTCC        |
| hsa-miR-711     | 4.45x10 <sup>-2</sup> | 6.035909          | Down       | CTTACGTCTCTCCCTG       |
| hsa-miR-7110-5p | 7.22x10 <sup>-3</sup> | 2.518241          | Down       | CTCTCTCTCCCCACA        |
| hsa-miR-7156-3p | 4.74x10 <sup>-7</sup> | 42.54271          | Down       | ACCAGTTCCCCAAGTG       |
| hsa-miR-7162-3p | 2.36x10 <sup>-2</sup> | 6.089353          | Down       | GCTGCTGTTCCACC         |
| hsa-miR-7515    | 2.11x10 <sup>-3</sup> | 36.72478          | Down       | GTCACCATCTTCCCTT       |
| hsa-miR-765     | 9.75x10 <sup>-3</sup> | 10.72408          | Down       | CATCACCTTCTTCTCCT      |
| hsa-miR-770-5p  | 4.65x10 <sup>-3</sup> | 13.13964          | Up         | TGGCCCTGACACGTGGT      |
| hsa-miR-7851-3p | 4.26x10 <sup>-4</sup> | 14.8858           | Down       | TCCAACCTCAGTCTCC       |
| hsa-miR-7854-3p | 4.11x10 <sup>-2</sup> | 13.74858          | Down       | TTCCCATCTGCGGTC        |
| hsa-miR-7977    | 3.42x10 <sup>-2</sup> | 3.606853          | Up         | TGGTGC GTTGGCTG        |
| hsa-miR-8052    | 1.88x10 <sup>-3</sup> | 14.40435          | Down       | GCTCATGCCCTCTACA       |
| hsa-miR-8060    | 3.58x10 <sup>-2</sup> | 2.226007          | Down       | GTCTCCTACCCACT         |
| hsa-miR-8072    | 3.82x10 <sup>-2</sup> | 2.508395          | Down       | CTGCCTACCTCCCC         |
| hsa-miR-8075    | 3.81x10 <sup>-2</sup> | 27.90251          | Down       | CAGACCCGACATCTG        |
| hsa-miR-8085    | 3.16x10 <sup>-2</sup> | 14.8816           | Down       | GCCTCACAGTCTCT         |
| hsa-miR-921     | 3.58x10 <sup>-2</sup> | 6.269681          | Up         | GAATCCTGGTTCTGTCC      |
| hsa-miR-9500    | 1.68x10 <sup>-2</sup> | 13.57318          | Down       | GTGGTCACCATCTTCC       |

Fold-change (abs), absolute value of multiple differences between groups.
